# Supplementary material for: Dexras1 is a homeostatic regulator of exercise-dependent proliferation and cell survival in the hippocampal neurogenic niche
Source: PubMed Central journal article supplement (PMC5871767; doi:10.1038/s41598-018-23673-z), 2018-03-28
Supplement: 41598_2018_23673_MOESM1_ESM.pdf [file 41598_2018_23673_MOESM1_ESM.pdf]

## Supplemental Information

### **Dexas1 is a homeostatic regulator of exercise-dependent proliferation and cell survival in the hippocampal neurogenic niche**

Pascale Bouchard-Cannon,<sup>1,2</sup> Christopher Lowden<sup>1,2</sup>, Dennison Trinh,<sup>1,2</sup> Hai-Ying M. Cheng<sup>1,2\*</sup>

## Supplemental Figures

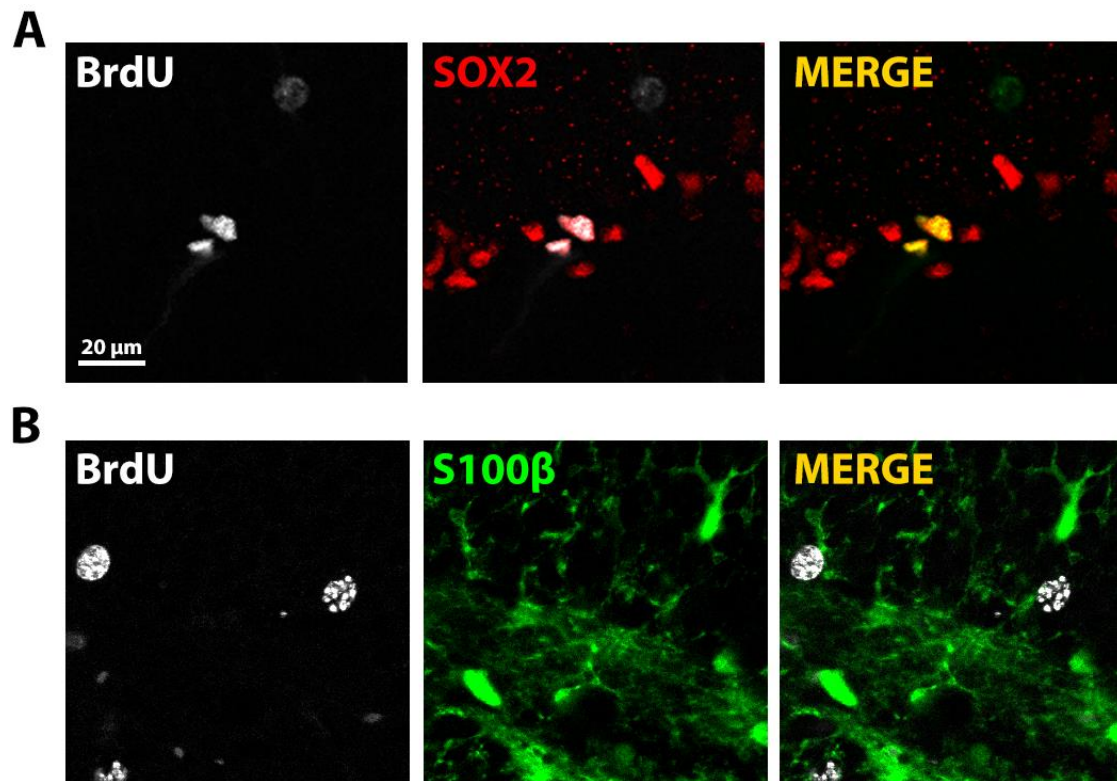

**Figure S1. Co-localization of 28-days post-injection (DPI) label-retaining BrdU<sup>+</sup> cells with SOX2 or S100 $\beta$  within the Subgranular Zone (SGZ) and Dentate Gyrus (DG). (A) Representative photomicrograph of BrdU (white) and SOX2 (red) co-localization in the SGZ at 28 DPI. (B) Representative photomicrograph of BrdU (white) and S100B (green) expression in the DG at 28 DPI.**

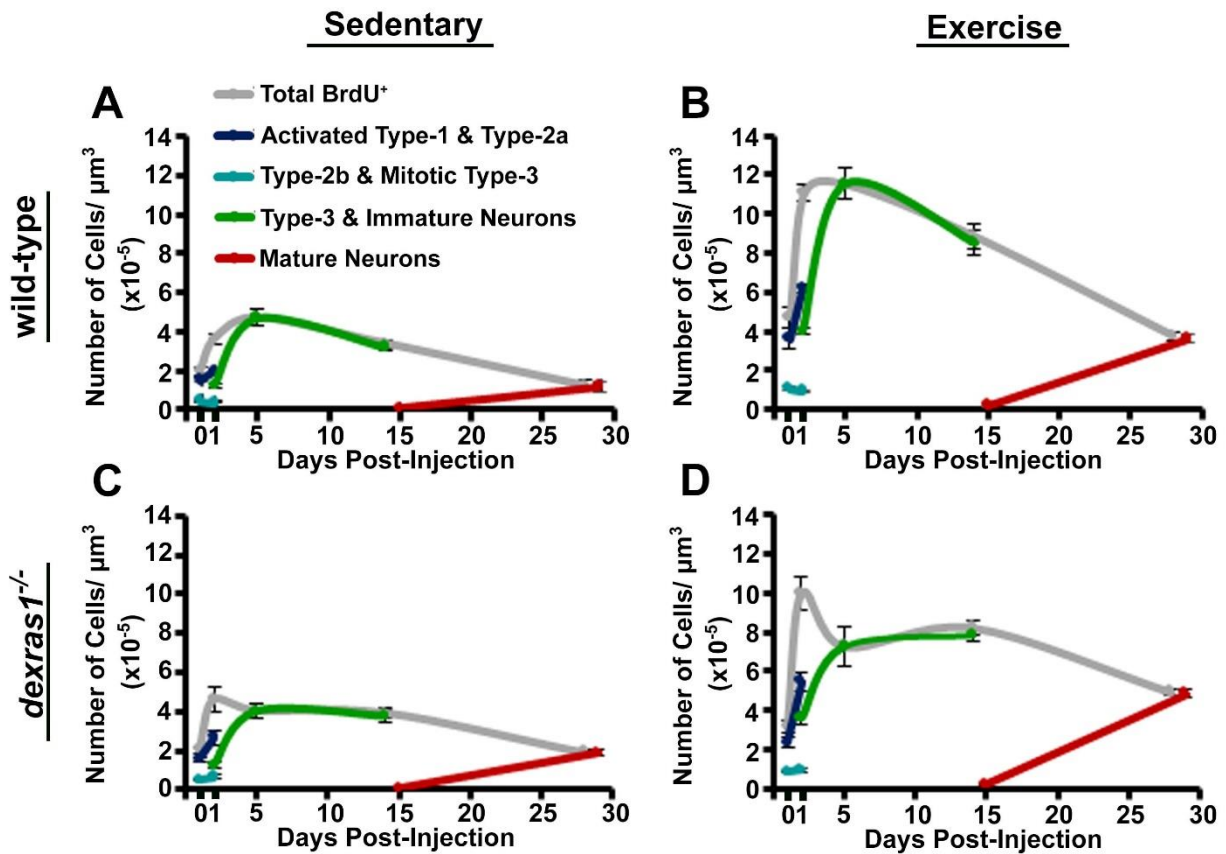

**Figure S2. Fate of BrdU-labeled dividing cells in the SGZ of sedentary and exercised mice. (A-D)** Quantification of the number of total BrdU<sup>+</sup> cells (grey), activated type-1 & type-2a cells (blue), type-2b & mitotic type-3 cells (turquoise), post-mitotic type-3 & immature neurons (green), and mature neurons (red) per  $\mu\text{m}^3$  of SGZ ( $\times 10^{-5}$ ) from 1 hour to 28 days post-BrdU injection, in **(A)** sedentary wild-type mice, **(B)** exercised wild-type mice, **(C)** sedentary *dexas1*<sup>-/-</sup> mice, and **(D)** exercised *dexas1*<sup>-/-</sup> mice. All values represent mean  $\pm$  standard error.

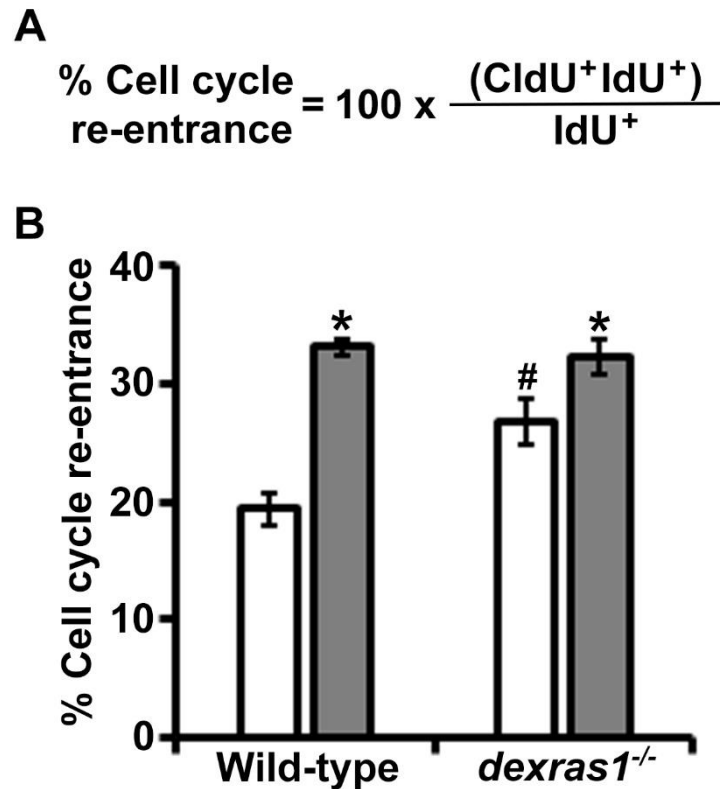

**Figure S3. Exercise enhances cell cycle re-entrance of type-2 cells. Relates to Fig. 4.** Wild-type and *dexas1*<sup>-/-</sup> mice were injected with equimolar amounts of IdU and CldU, spaced 18-hrs apart, after either 5 days of sedentary or exercise conditions. **(A)** Formula used to calculate the estimated % cell cycle re-entrance of S-phase cells after 18-hrs. **(B)** Quantification of the % cell cycle entrance. Values represent mean ± standard error or estimated value. \**p*<0.05 vs. sedentary control. #*p*<0.05 vs. wild-type control. *n*= 4-5 per group.

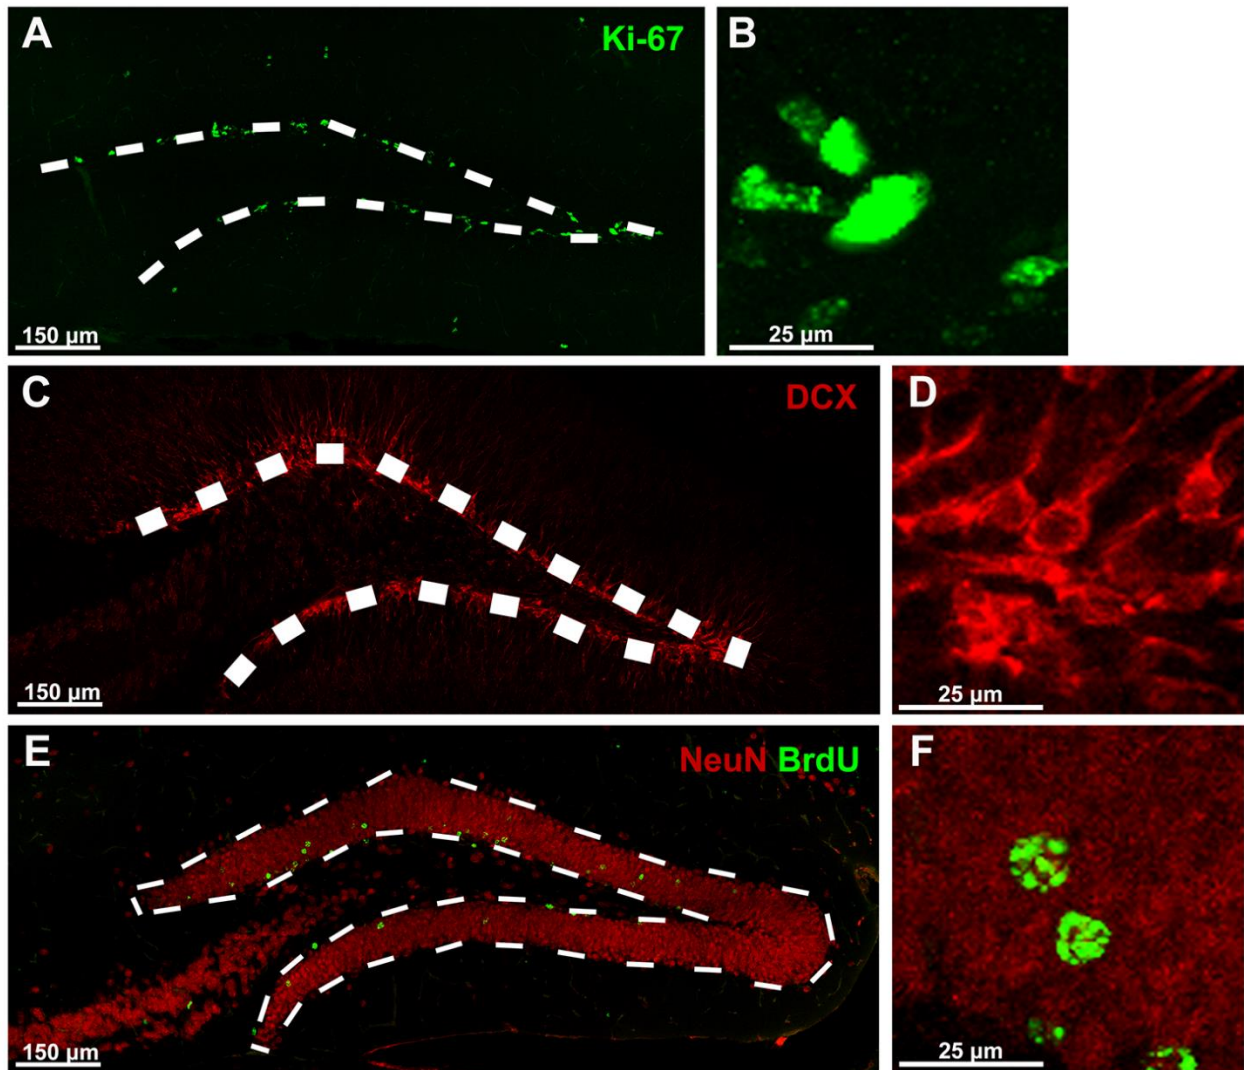

**Figure S4. Delimited hippocampal area used for density measurements (A, C, E)** Representative photomicrographs of **(A)** Ki-67, **(C)** DCX, and **(E)** NeuN/ BrdU. White hashed lines represent the area used for density measurements. **(B, D, F)** Zoomed-in images of **(B)** Ki-67, **(D)** DCX, and **(F)** NeuN/ BrdU. Images are represented as a **(A-B, E-F)** collapsed z-stack image (30- $\mu\text{m}$ ) or **(C-D)** a single z-stack image (5- $\mu\text{m}$ ) acquired at 40x magnification.

## Supplemental Tables

**Table S1. Label Retaining Assay Cell Counts**

| <b>Total BrdU</b><br>(number of cells per $\mu\text{m}^3$ ) ( $\times 10^{-5}$ )                                                         |                  |                 |                 |                 |                  |                 |
|------------------------------------------------------------------------------------------------------------------------------------------|------------------|-----------------|-----------------|-----------------|------------------|-----------------|
| <b>Genotype</b>                                                                                                                          | <b>Condition</b> | <b>1 HPI</b>    | <b>1 DPI</b>    | <b>5 DPI</b>    | <b>14 DPI</b>    | <b>28 DPI</b>   |
| wild-type                                                                                                                                | Sedentary        | 2.0 $\pm$ 0.2   | 3.6 $\pm$ 0.3   | 5.3 $\pm$ 0.5   | 3.4 $\pm$ 0.2    | 1.3 $\pm$ 0.3   |
| wild-type                                                                                                                                | Exercise         | 4.7 $\pm$ 0.6*  | 11.1 $\pm$ 0.4* | 12.2 $\pm$ 0.8* | 8.9 $\pm$ 0.6*   | 2.3 $\pm$ 0.2   |
| <i>dexas1</i> <sup>-/-</sup>                                                                                                             | Sedentary        | 2.0 $\pm$ 0.1   | 4.6 $\pm$ 0.6   | 4.4 $\pm$ 0.4   | 3.9 $\pm$ 0.2    | 1.9 $\pm$ 0.1   |
| <i>dexas1</i> <sup>-/-</sup>                                                                                                             | Exercise         | 3.1 $\pm$ 0.3*# | 10.0 $\pm$ 0.8* | 7.8 $\pm$ 0.1*# | 8.2 $\pm$ 0.4*   | 4.9 $\pm$ 0.2*# |
| <b>Total Type 2a (BrdU<sup>+</sup> Ki-67<sup>+</sup> DCX<sup>-</sup>)</b><br>(number of cells per $\mu\text{m}^3$ ) ( $\times 10^{-5}$ ) |                  |                 |                 |                 |                  |                 |
| <b>Genotype</b>                                                                                                                          | <b>Condition</b> | <b>1 HPI</b>    | <b>1 DPI</b>    | <b>5 DPI</b>    | <b>14 DPI</b>    | <b>28 DPI</b>   |
| wild-type                                                                                                                                | Sedentary        | 1.5 $\pm$ 0.1   | 2.0 $\pm$ 0.2   | ND              | ND               | ND              |
| wild-type                                                                                                                                | Exercise         | 3.6 $\pm$ 0.5*  | 6.1 $\pm$ 0.2*  | ND              | ND               | ND              |
| <i>dexas1</i> <sup>-/-</sup>                                                                                                             | Sedentary        | 1.5 $\pm$ 0.9   | 2.7 $\pm$ 0.4   | ND              | ND               | ND              |
| <i>dexas1</i> <sup>-/-</sup>                                                                                                             | Exercise         | 2.3 $\pm$ 0.3*# | 5.5 $\pm$ 0.5*  | ND              | ND               | ND              |
| <b>Total Type 2b (BrdU<sup>+</sup> Ki-67<sup>+</sup> DCX<sup>+</sup>)</b><br>(number of cells per $\mu\text{m}^3$ ) ( $\times 10^{-6}$ ) |                  |                 |                 |                 |                  |                 |
| <b>Genotype</b>                                                                                                                          | <b>Condition</b> | <b>1 HPI</b>    | <b>1 DPI</b>    | <b>5 DPI</b>    | <b>14 DPI</b>    | <b>28 DPI</b>   |
| wild-type                                                                                                                                | Sedentary        | 4.4 $\pm$ 0.8   | 4.0 $\pm$ 0.2   | ND              | ND               | ND              |
| wild-type                                                                                                                                | Exercise         | 10.8 $\pm$ 1.2  | 9.3 $\pm$ 0.6*  | ND              | ND               | ND              |
| <i>dexas1</i> <sup>-/-</sup>                                                                                                             | Sedentary        | 4.8 $\pm$ 0.6   | 6.8 $\pm$ 1.1#  | ND              | ND               | ND              |
| <i>dexas1</i> <sup>-/-</sup>                                                                                                             | Exercise         | 8.4 $\pm$ 0.7   | 9.1 $\pm$ 0.8*  | ND              | ND               | ND              |
| <b>Total Type 3 (BrdU<sup>+</sup> Ki-67<sup>-</sup> DCX<sup>+</sup>)</b><br>(number of cells per $\mu\text{m}^3$ ) ( $\times 10^{-5}$ )  |                  |                 |                 |                 |                  |                 |
| <b>Genotype</b>                                                                                                                          | <b>Condition</b> | <b>1 HPI</b>    | <b>1 DPI</b>    | <b>5 DPI</b>    | <b>14 DPI</b>    | <b>28 DPI</b>   |
| wild-type                                                                                                                                | Sedentary        | ND              | 1.2 $\pm$ 0.1   | 4.7 $\pm$ 0.4   | 3.2 $\pm$ 0.2    | ND              |
| wild-type                                                                                                                                | Exercise         | ND              | 4.0 $\pm$ 0.2*  | 11.5 $\pm$ 0.8* | 8.5 $\pm$ 0.6*   | ND              |
| <i>dexas1</i> <sup>-/-</sup>                                                                                                             | Sedentary        | ND              | 1.2 $\pm$ 0.2   | 4.0 $\pm$ 0.4   | 3.8 $\pm$ 0.3    | ND              |
| <i>dexas1</i> <sup>-/-</sup>                                                                                                             | Exercise         | ND              | 3.6 $\pm$ 0.3*  | 7.3 $\pm$ 1.0*# | 7.8 $\pm$ 0.4*   | ND              |
| <b>Newborn Neurons (BrdU<sup>+</sup> NeuN<sup>+</sup>)</b><br>(number of cells per $\mu\text{m}^3$ ) ( $\times 10^{-5}$ )                |                  |                 |                 |                 |                  |                 |
| <b>Genotype</b>                                                                                                                          | <b>Condition</b> | <b>1 HPI</b>    | <b>1 DPI</b>    | <b>5 DPI</b>    | <b>14 DPI</b>    | <b>28 DPI</b>   |
| wild-type                                                                                                                                | Sedentary        | ND              | ND              | ND              | 0.10 $\pm$ 0.01  | 1.2 $\pm$ 0.3   |
| wild-type                                                                                                                                | Exercise         | ND              | ND              | ND              | 0.18 $\pm$ 0.02* | 3.6 $\pm$ 0.2*  |
| <i>dexas1</i> <sup>-/-</sup>                                                                                                             | Sedentary        | ND              | ND              | ND              | 0.07 $\pm$ 0.02  | 1.9 $\pm$ 0.1   |
| <i>dexas1</i> <sup>-/-</sup>                                                                                                             | Exercise         | ND              | ND              | ND              | 0.20 $\pm$ 0.03* | 4.8 $\pm$ 0.2*# |

ND : Not detected

\* : Significant at  $p \leq 0.05$  within the same genotype.

# : Significant at  $p \leq 0.05$  between genotypes of the same condition.

**Table S2. Fold changes in BrdU<sup>+</sup> cells relative to genotype, condition and time**

| <b>Fold change in BrdU within the same harvest time and genotype</b>                             |                  |              |              |              |               |               |
|--------------------------------------------------------------------------------------------------|------------------|--------------|--------------|--------------|---------------|---------------|
| <b>((Exercise – Sedentary) / Sedentary)</b>                                                      |                  |              |              |              |               |               |
| <b>Genotype</b>                                                                                  | <b>Condition</b> | <b>1 HPI</b> | <b>1 DPI</b> | <b>5 DPI</b> | <b>14 DPI</b> | <b>28 DPI</b> |
| wild-type                                                                                        | Sedentary        | 0.00         | 0.00         | 0.00         | 0.00          | 0.00          |
| wild-type                                                                                        | Exercise         | 1.38         | 2.06         | 1.32         | 1.62          | 1.99          |
| <i>dexas1<sup>-/-</sup></i>                                                                      | Sedentary        | 0.00         | 0.00         | 0.00         | 0.00          | 0.00          |
| <i>dexas1<sup>-/-</sup></i>                                                                      | Exercise         | 0.56         | 1.18         | 0.79         | 1.10          | 1.58          |
| <b>Fold Change in BrdU relative to 1 HPI within the same genotype and condition</b>              |                  |              |              |              |               |               |
| <b>((DPI – 1 HPI)/1 HPI)</b>                                                                     |                  |              |              |              |               |               |
| <b>Genotype</b>                                                                                  | <b>Condition</b> | <b>1 HPI</b> | <b>1 DPI</b> | <b>5 DPI</b> | <b>14 DPI</b> | <b>28 DPI</b> |
| wild-type                                                                                        | Sedentary        | 0.00         | 0.83         | 1.66         | 0.72          | -0.37         |
| wild-type                                                                                        | Exercise         | 0.00         | 1.35         | 1.60         | 0.89          | -0.20         |
| <i>dexas1<sup>-/-</sup></i>                                                                      | Sedentary        | 0.00         | 1.26         | 1.15         | 0.93          | -0.06         |
| <i>dexas1<sup>-/-</sup></i>                                                                      | Exercise         | 0.00         | 2.17         | 1.47         | 1.61          | 0.56          |
| <b>Fold Change in BrdU relative between harvest times within the same genotype and condition</b> |                  |              |              |              |               |               |
| <b>((DPI – previous DPI)/ previous DPI)</b>                                                      |                  |              |              |              |               |               |
| <b>Genotype</b>                                                                                  | <b>Condition</b> | <b>1 HPI</b> | <b>1 DPI</b> | <b>5 DPI</b> | <b>14 DPI</b> | <b>28 DPI</b> |
| wild-type                                                                                        | Sedentary        | 0.00         | 0.83         | 0.46         | -0.36         | -0.63         |
| wild-type                                                                                        | Exercise         | 0.00         | 1.35         | 0.10         | -0.27         | -0.58         |
| <i>dexas1<sup>-/-</sup></i>                                                                      | Sedentary        | 0.00         | 1.26         | -0.05        | -0.10         | -0.51         |
| <i>dexas1<sup>-/-</sup></i>                                                                      | Exercise         | 0.00         | 2.17         | -0.22        | 0.06          | -0.40         |

**Table S3. Antibody concentrations for immunofluorescence, immunohistochemistry and western blotting.**

| <b>Antibody</b>                             | <b>Dilution</b>                               | <b>Cat. No.</b> | <b>Company</b>            |
|---------------------------------------------|-----------------------------------------------|-----------------|---------------------------|
| rat anti-BrdU/ CldU                         | 1:4,000 (BrdU IHC)<br>1:1,000 (BrdU/ CldU IF) | OBT0030G        | Bio-Rad Laboratories      |
| mouse monoclonal anti-BrdU                  | 1:2,000                                       | 347580          | BD Biosciences            |
| mouse monoclonal anti-IdU                   | 1:4,000                                       | 32D8.D9         | Novus Bio                 |
| rat anti-Ki-67                              | 1:1,000                                       | SolA15          | eBioscience               |
| goat polyclonal anti-Doublecortin           | 1:100                                         | C-18            | Santa Cruz Biotechnology  |
| mouse monoclonal anti-NeuN                  | 1:1,000                                       | A60             | EMD Millipore             |
| goat polyclonal anti-Sox2                   | 1:1,000                                       | Y-17x           | Santa Cruz Biotechnology  |
| mouse anti-GFAP                             | 1:1,000                                       | A21282          | Life Technologies         |
| rabbit anti-S100B                           | 1:500                                         | ab52642         | Abcam                     |
| rabbit anti-p-CREB (Ser133)                 | 1:100                                         | 9198S           | Cell Signaling Technology |
| rabbit anti-NR2A                            | 1:10,000                                      | ab133265        | Abcam                     |
| rabbit anti-NR2B                            | 1:10,000                                      | 4207S           | Cell Signaling Technology |
| rabbit anti-Phospho-p44/42 MAPK (T202/Y204) | 1:5,000                                       | 9101S           | Cell Signaling Technology |
| rabbit anti-p44/42 MAPK                     | 1:1,000                                       | 9102S           | Cell Signaling Technology |
| rabbit anti-actin                           | 1:10,000                                      |                 | Sigma-Aldrich             |
| anti-rat IgG or anti-rabbit IgG             | 1:300                                         |                 | Vector Laboratories       |
| Alexa-Fluor secondary antibodies            | 1:1,000                                       |                 | Life Technologies         |
| goat anti-Rabbit IgG H&L (HRP)              | 1:100,000                                     |                 | Life Technologies         |

**Table S4. qPCR Primers**

| <b>Gene</b>   | <b>Forward</b>              | <b>Reverse</b>              |
|---------------|-----------------------------|-----------------------------|
| <i>bdnf</i>   | 5'-AGCATGAAATCTCCCAGCCT-3'  | 5'-CGGTCCCCAAGGTTCTAGAC-3'  |
| <i>trkb</i>   | 5'-CGCCCTGTGAGCTGAACTCTG-3' | 5'-CTGCTTCTCAGCTGCCTGACC-3' |
| <i>vegf-a</i> | 5'-CCAGGAGGACCTTGTGTGAT-3'  | 5'-GGGAAGGGAAGATGAGGAAG-3'  |
| <i>dexas1</i> | 5'-CCACACAACCTGAGGACCTT-3'  | 5'-TTCACAGCAGGTGACTGTCC-3'  |
| <i>gapdh</i>  | 5'-TCCATGACAACCTTTGGCATT-3' | 5'-GTTGCTGTTGAAGTCGCAGG-3'  |
